# Supplementary material for: Genomics of CpG Methylation in Developing and Developed Zebrafish
Source: PubMed Central journal article supplement (PMC4025485; doi:10.1534/g3.113.009514), 2014-03-21
Supplement: supp_g3.113.009514_009514SI.pdf [file supp_g3.113.009514_009514SI.pdf]

## **Genomics of CpG Methylation in Developing and Developed Zebrafish**

David M. McGaughey<sup>1</sup>, Hatice Ozel Abaan<sup>1</sup>, Ryan M. Miller<sup>1</sup>, Peter A. Kropp<sup>1</sup>, Lawrence C. Brody<sup>1</sup>

<sup>1</sup>Molecular Pathogenesis Section, Genome Technology Branch, National Human Genome Research Institute, National Institutes of Health, Bethesda, MD, USA.

Corresponding Author:  
Lawrence C. Brody, Ph.D.  
Building 50, Room 5306  
50 South Drive  
Bethesda, MD 20814  
301-496-7824  
[lbrody@mail.nih.gov](mailto:lbrody@mail.nih.gov)

Data Deposit:  
GSE52110

**DOI: 10.1534/g3.113.009514**

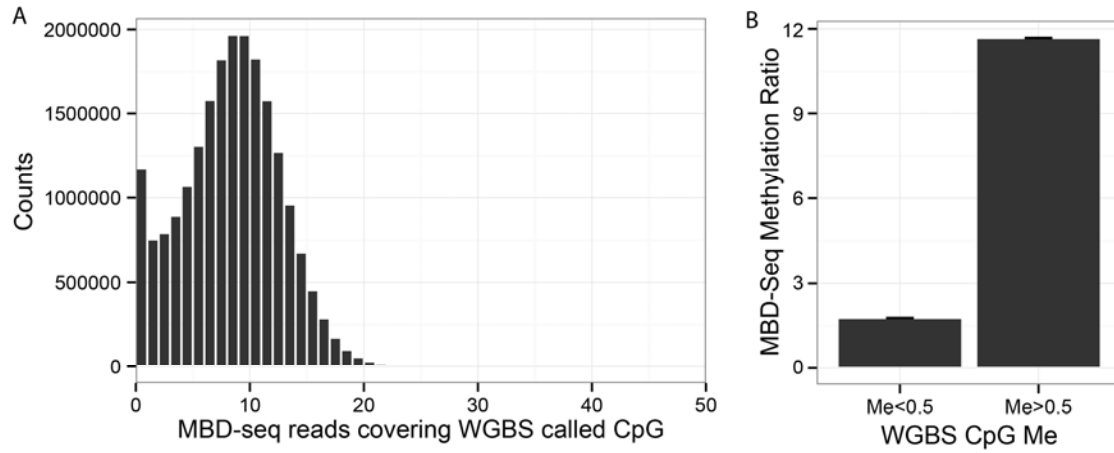

**Figure S1** Concordance of MBD-seq and Jiang *et al.* whole genome bisulfite-seq (WGBS) at the MBT time point in zebrafish. (A) Histogram of methylation enriched reads overlapping Jiang *et al.* identified methylated CpGs. Over 70% of the  $19.4 \times 10^6$  CpGs with a methylation of greater than 0.5 (1 being fully methylated, 0 being unmethylated) have at least one overlapping MBD-seq read. (B) Average MBD-seq read ratio scores at Jiang *et al.* CpGs with methylation less than 0.5 and greater than 0.5. Standard error shown.

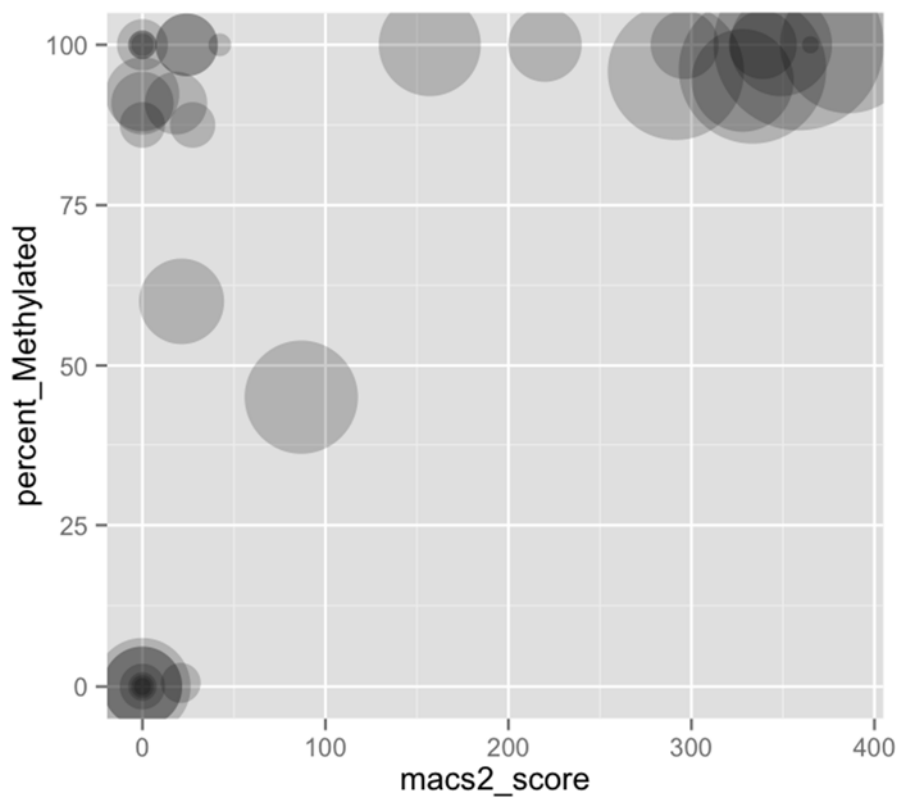

**Figure S2** MACS2\_score versus bisulfite-converted CpG methylation (sanger sequencing). MACS2 score is on the x-axis with percent CpG methylation on the y-axis, as determined by bisulfite conversion and sanger sequencing. The size of the dot is proportional to the number of CpGs assayed.

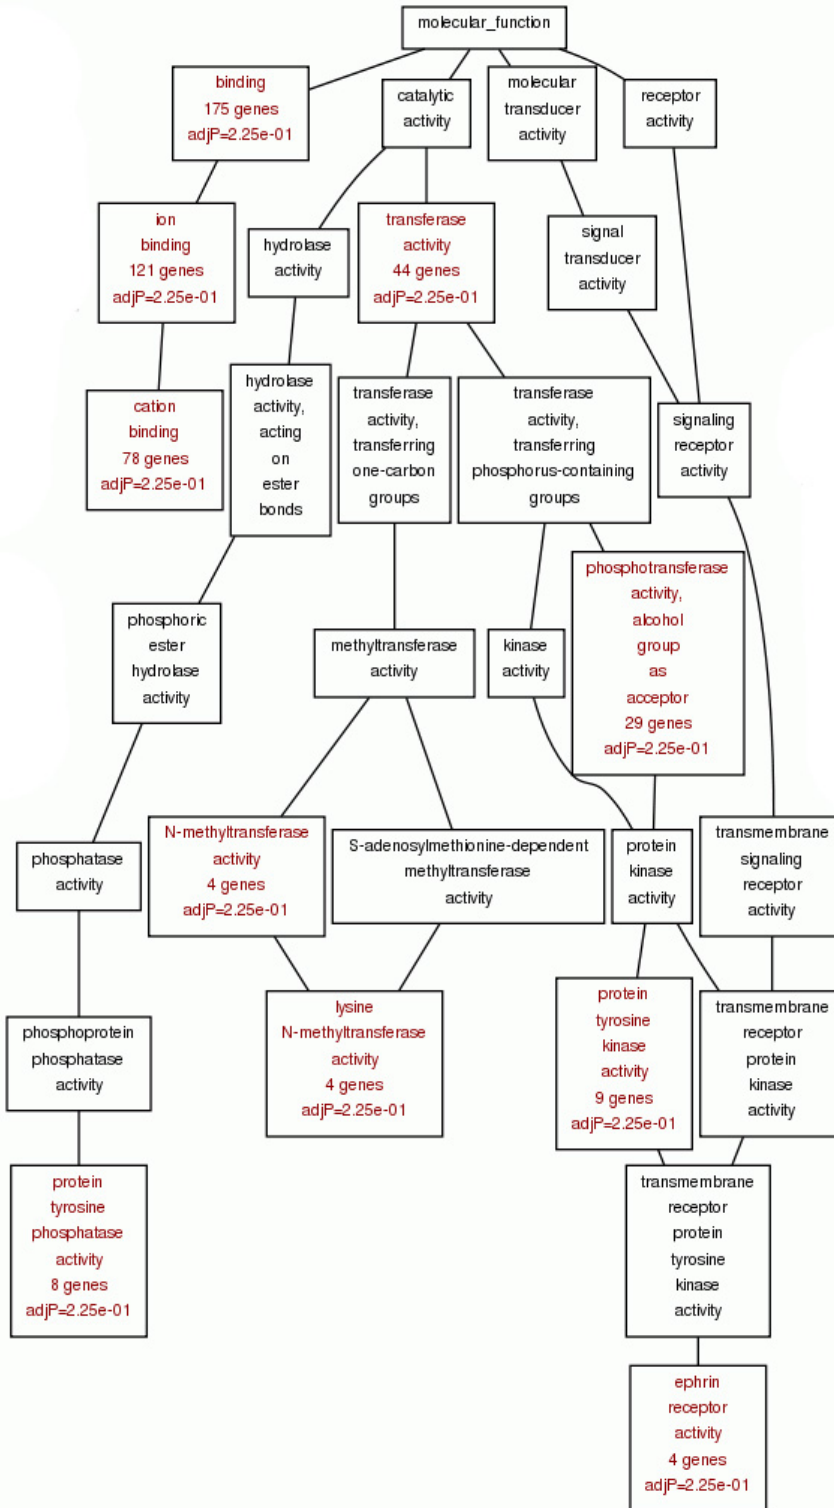

**Figure S3** WebGestalt molecular function GO term analysis genes with unique exon peaks in 3dpf methotrexate treated zebrafish relative to control 3dpf zebrafish.

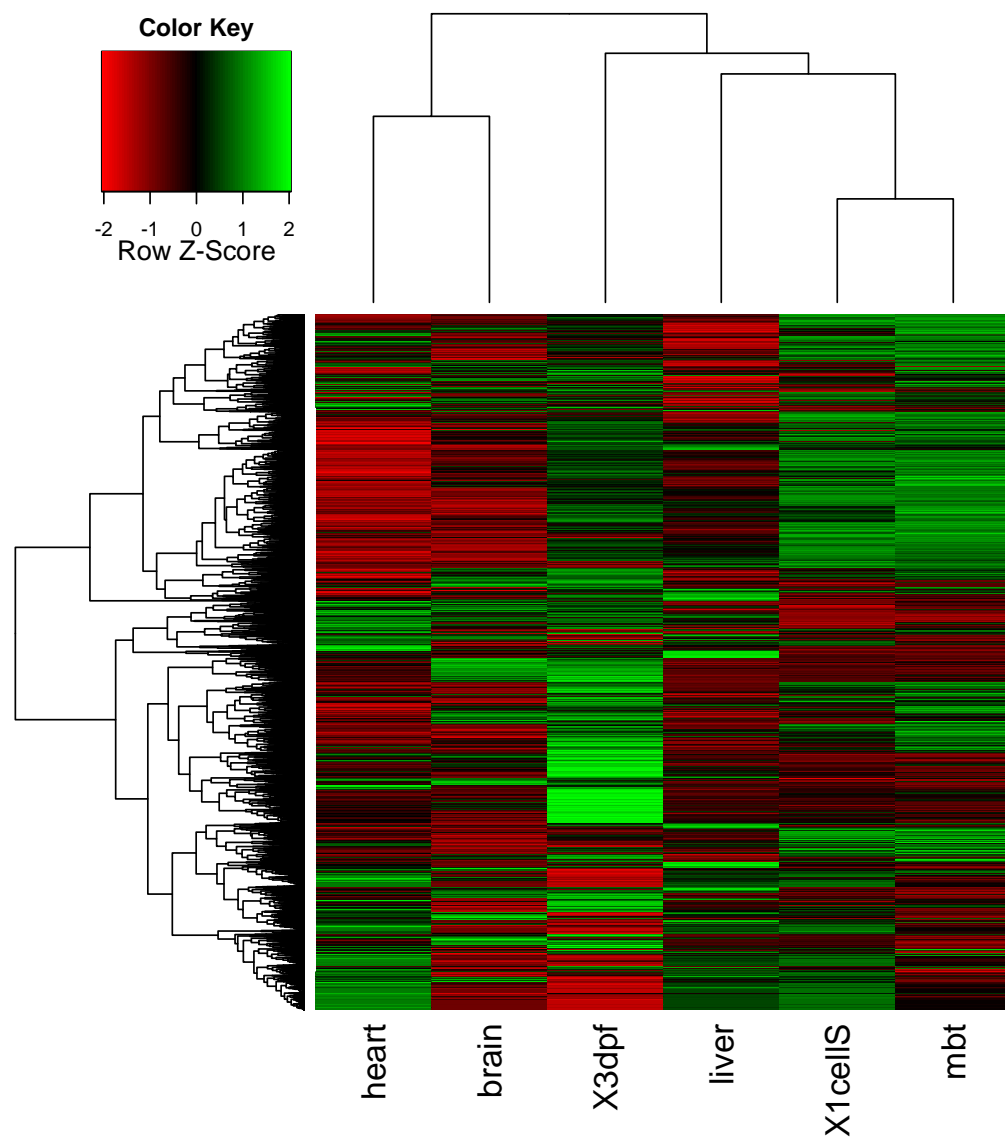

**Figure S4** Clustering of RNA-seq expression across the six cell types. All zebrafish genes are clustered on the rows.

**Table S1 Enrichment performance of the NEB EpiMark 5-mC system.** Ct scores from qPCR are shown along with the standard deviation. Enrichment is calculated by comparing Ct values from regions known to be methylation positive (me+) to regions known to be methylation poor (me-).

| Lane | Tissue                   | Number of Total Reads | Number of Reads mapQ > 5 | Number of Properly Paired Unique Reads, mapQ > 5 |
|------|--------------------------|-----------------------|--------------------------|--------------------------------------------------|
| 4    | Brain<br>UnMe Brain      | 87,411,962            | 40,717,029               | 17,146,152                                       |
| 4    | (Control)                | 93,316,244            | 74,579,958               | 37,140,721                                       |
| 4    | Liver                    | 89,493,944            | 43,088,933               | 18,221,225                                       |
| 4    | Heart                    | 88,729,694            | 42,024,288               | 18,593,167                                       |
| 4    | Eye                      | 86,522,756            | 39,303,576               | 14,639,460                                       |
| 5    | Brain<br>UnMe Brain      | 89,582,450            | 41,089,919               | 17,344,084                                       |
| 5    | (Control)                | 89,959,638            | 71,824,799               | 35,933,160                                       |
| 5    | 1-cell                   | 69,856,440            | 45,189,947               | 15,677,629                                       |
| 5    | Sperm                    | 75,491,368            | 42,197,998               | 19,429,347                                       |
| 5    | MBT                      | 63,402,436            | 36,063,223               | 17,375,340                                       |
| 3    | 3dpf.mtx                 | 86,531,596            | 49,655,034               | 16,627,123                                       |
| 3    | 3dpf<br>3dpf.mtx<br>UnMe | 85,494,066            | 45,460,989               | 19,458,515                                       |
| 3    | (Control)<br>3dpf UnMe   | 95,881,946            | 76,243,106               | 38,340,957                                       |
| 3    | (Control)                | 95,881,946            | 89,661,095               | 45,038,786                                       |

**Table S2 Enrichment performance of the NEB EpiMark 5-mC system.** Ct scores from qPCR are shown along with the standard deviation. Enrichment is calculated by comparing Ct values from regions known to be methylation positive (me+) to regions known to be methylation poor (me-).

| primers             | Me_Enriched |             | Flow_through (me_poor) |             |
|---------------------|-------------|-------------|------------------------|-------------|
|                     | Ct score    | stdev       | Ct score               | stdev       |
| tert (me+)          | 21.1439275  | 0.171582996 | 22.16167               | 0.003125412 |
| sox2 (me-)          | 32.9350965  | 0.115988847 | 21.146596              | 0.331689649 |
| diagenode spike me+ | 21.6001225  | 0.356402324 | 21.750327              | 0.09125213  |
| diagenode spike me- | 32.073724   | 0.252106195 | 19.2906445             | 0.09318041  |
| Enrichment (in Ct)  |             |             |                        |             |
| tert/sox2           | 12.806243   | 0.391052335 |                        |             |
| diagenode spike set | 12.933284   | 0.455620116 |                        |             |
| Fold Enrichment:    |             |             |                        |             |
| tert/sox2           | 5461.913175 | to          | 9392.511975            |             |
| diagenode spike set | 5703.626851 | to          | 10726.59165            |             |

**Table S3** Primer sequence and coordinates for primers used in Table S2.

---

|                        |                             |
|------------------------|-----------------------------|
| sox2 FP                | ttgcacctgtacctccgaa         |
| sox2 RP                | gaaatccacagccactcttg        |
| sox2 coordinates (Zv9) | chr22:40,332,024-40,332,146 |
| tert FP                | agacggctacagcaggacag        |
| tert RP                | agcgttagcatgaactcc          |
| tert coordinates (Zv9) | chr19:605,507-605,752       |

---
