# Supplementary material for: Genomics of CpG Methylation in Developing and Developed Zebrafish
Source: PubMed Central journal article supplement (PMC4025485; doi:10.1534/g3.113.009514), 2014-03-21
Supplement: supp_g3.113.009514_FigureS2.pdf [file supp_g3.113.009514_FigureS2.pdf]

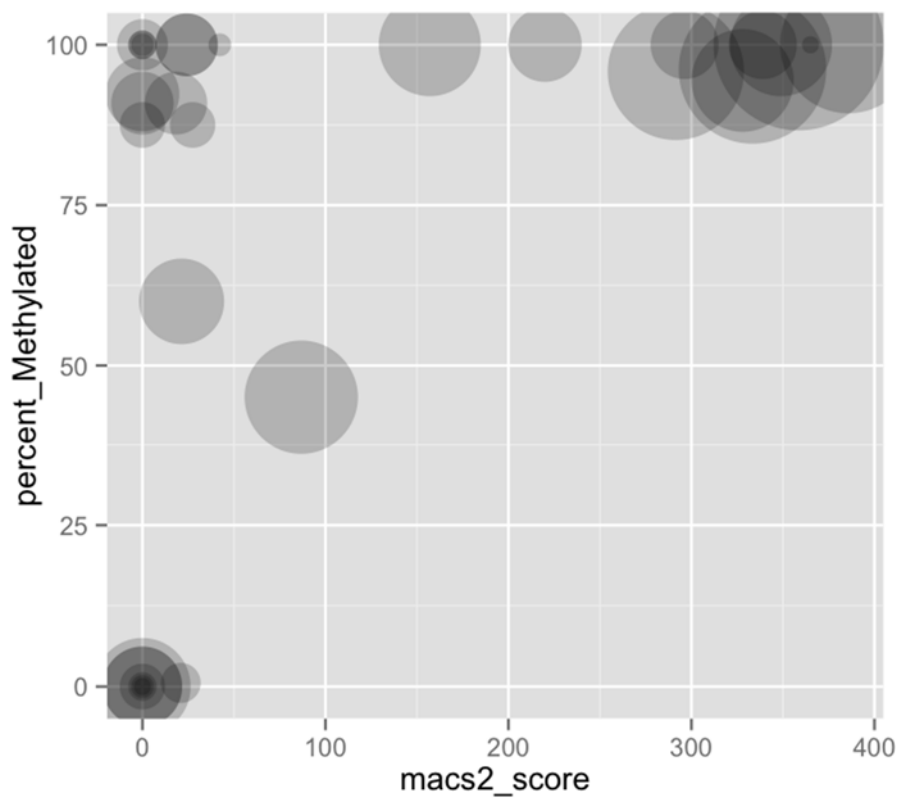

**Figure S2** MACS2\_score versus bisulfite-converted CpG methylation (sanger sequencing). MACS2 score is on the x-axis with percent CpG methylation on the y-axis, as determined by bisulfite conversion and sanger sequencing. The size of the dot is proportional to the number of CpGs assayed.
